# Supplementary material for: Characterization of human UDP-glucuronosyltransferases responsible for glucuronidation and inhibition of norbakuchinic acid, a primary metabolite of hepatotoxicity and nephrotoxicity component bakuchiol inPsoralea corylifolia L.
Source: Royal Society of Chemistry journal article supplement (doi:10.1039/c7ra10376j), 2017-01-01
Supplement: c7ra10376j1.pdf [file c7ra10376j1.pdf]

## Supporting Information

Characterization of human UDP-glucuronosyltransferases responsible for glucuronidation and inhibition of norbakuchinic acid, a primary metabolite of hepatotoxicity and nephrotoxicity component bakuchoil in *Psoralea corylifolia* L.

Zhihong Yao,<sup>†\*ab</sup> Shishi Li,<sup>†a</sup> Zifei Qin,<sup>\*abc</sup> Xiaodan Hong,<sup>ad</sup> Yi Dai,<sup>ab</sup> Baojian Wu,<sup>ab</sup> Wencai Ye,<sup>abc</sup> Frank J Gonzalez<sup>e</sup> and Xinsheng Yao<sup>abcd</sup>

<sup>a</sup>College of Pharmacy, Jinan University, Guangzhou 510632, P.R. China;

<sup>b</sup>Guangdong Provincial Key Laboratory of Pharmacodynamic Constituents of TCM and New Drugs Research, College of Pharmacy, Jinan University, Guangzhou 510632, P.R. China;

<sup>c</sup>Integrated Chinese and Western Medicine Postdoctoral research station, Jinan University, Guangzhou 510632, P.R. China;

<sup>d</sup>Guangzhou Research and Creativity Biotechnology Co. Ltd, Guangzhou, 510663, P. R. China;

<sup>e</sup>Laboratory of Metabolism, Center for Cancer Research, National Cancer Institute, National Institutes of Health, Bethesda, Maryland 20892, USA;

<sup>†</sup>These two authors contributed equally to this work.

\*Author to whom correspondence should be addressed.

*E-mail:* tyaozh@jnu.edu.cn; yaozhihong.jnu@gmail.com (Zhihong Yao);

*E-mail:* qzf1989@163.com (Zifei Qin);

## Figure Caption

**Figure S1** MS/MS spectra of norbakuchinic acid and its two glucuronides.

**Figure S2** Kinetic profiles for glucuronidation of norbakuchinic acid by various types of microsomes. (a) monkey liver microsomes (MkLM); (b) rat liver microsomes (RLM); (c) guinea pig liver microsomes (GpLM); (d) rabbit liver microsomes (RaLM); (e) dog liver microsomes (DLM); (f) mice liver microsomes (MLM); In each panel, the insert figure showed the corresponding Eadie-Hofstee plot. All experiments were performed in triplicate.

**Figure S3** Inhibition evaluation of NBKA toward Expressed UGT1A6-catalyzed 4-MU glucuronidation. Concentration-dependent plot (a) and Dixon plot (b) of NKBA's inhibition toward recombinant UGT1A6-catalyzed 4-MU glucuronidation. All experiments were performed in triplicate.

**Figure S4** Inhibition evaluation of NBKA toward Expressed UGT1A7-catalyzed 4-MU glucuronidation. Concentration-dependent plot (a) and Dixon plot (b) of NKBA's inhibition toward recombinant UGT1A7-catalyzed 4-MU glucuronidation. All experiments were performed in triplicate.

**Figure S5** Inhibition evaluation of NBKA toward Expressed UGT1A8-catalyzed 4-MU glucuronidation. Concentration-dependent plot (a) and Dixon plot (b) of NKBA's inhibition toward recombinant UGT1A8-catalyzed 4-MU glucuronidation. All experiments were performed in triplicate.

**Figure S6** Inhibition evaluation of NBKA toward Expressed UGT1A9-catalyzed propofol glucuronidation. Concentration-dependent plot (a) and Dixon plot (b) of NKBA's inhibition toward recombinant UGT1A9-catalyzed propofol glucuronidation. All experiments were performed in triplicate.

**Figure S7** Inhibition evaluation of NBKA toward Expressed UGT1A10-catalyzed 4-MU glucuronidation. Concentration-dependent plot (a) and Dixon plot (b) of NKBA's inhibition toward recombinant UGT1A10-catalyzed 4-MU glucuronidation. All experiments were performed in triplicate.

**Figure S8** Inhibition evaluation of NBKA toward Expressed UGT2B7-catalyzed AZT glucuronidation. Concentration-dependent plot (a) and Dixon plot (b) of NKBA's inhibition toward recombinant UGT2B7-catalyzed AZT glucuronidation. All experiments were performed in triplicate.

**Figure S9** Inhibition evaluation of NBKA toward Expressed UGT2B15-catalyzed 4-MU glucuronidation. Concentration-dependent plot (a) and Dixon plot (b) of NKBA's inhibition toward recombinant UGT2B15-catalyzed 4-MU glucuronidation. All experiments were performed in triplicate.

**Figure S10** Inhibition evaluation of NBKA toward Expressed UGT2B17-catalyzed SAHA glucuronidation. Concentration-dependent plot (a) and Dixon plot (b) of NKBA's inhibition toward recombinant UGT2B17-catalyzed SAHA glucuronidation. All experiments were performed in triplicate.

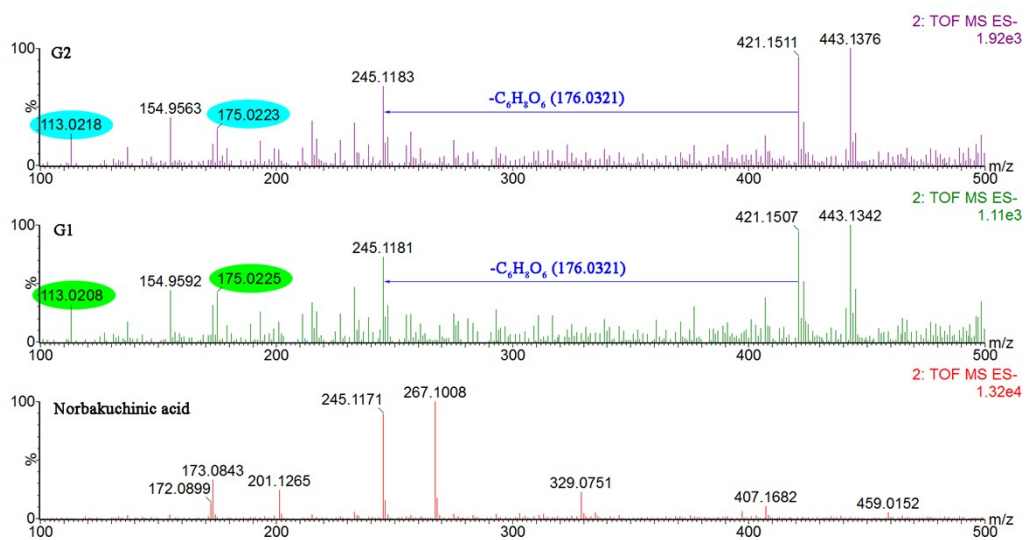

**Figure S1** MS/MS spectra of norbakuchinic acid and its two glucuronides.

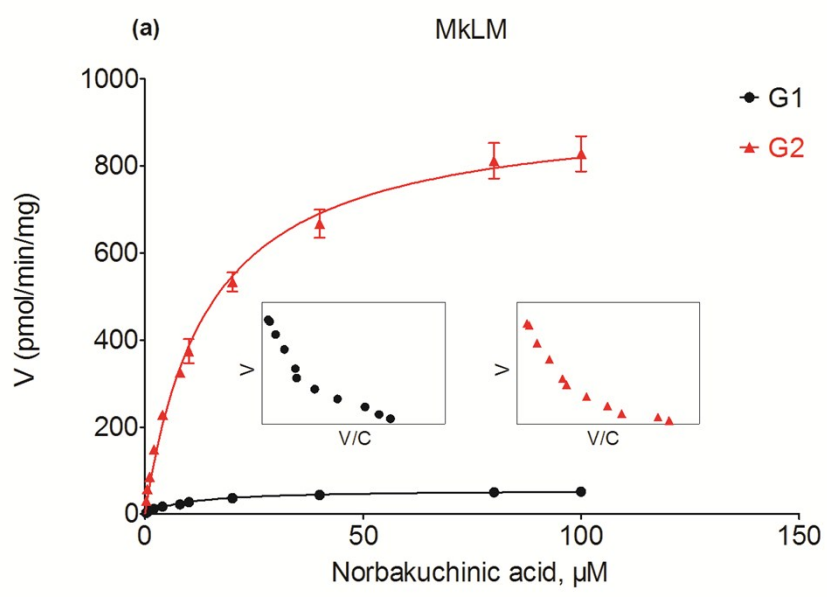

Figure S2-a

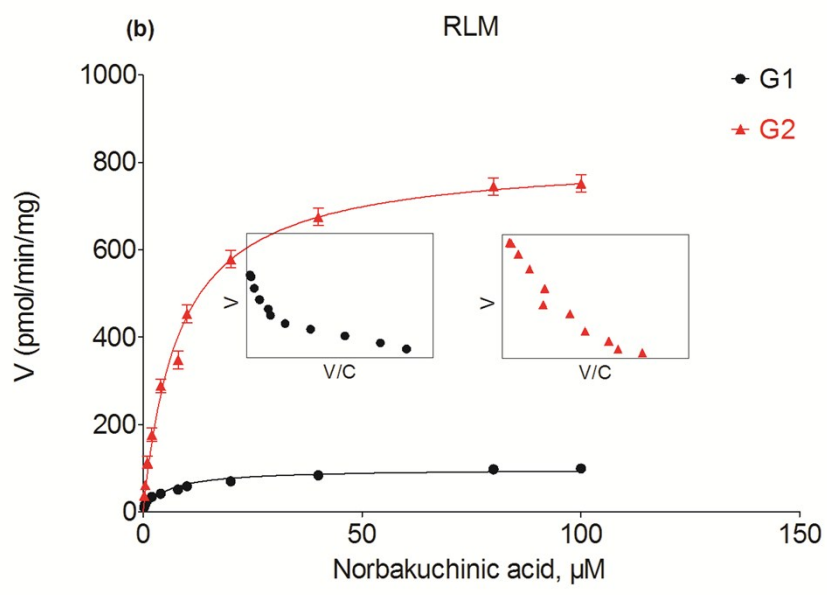

Figure S2-b

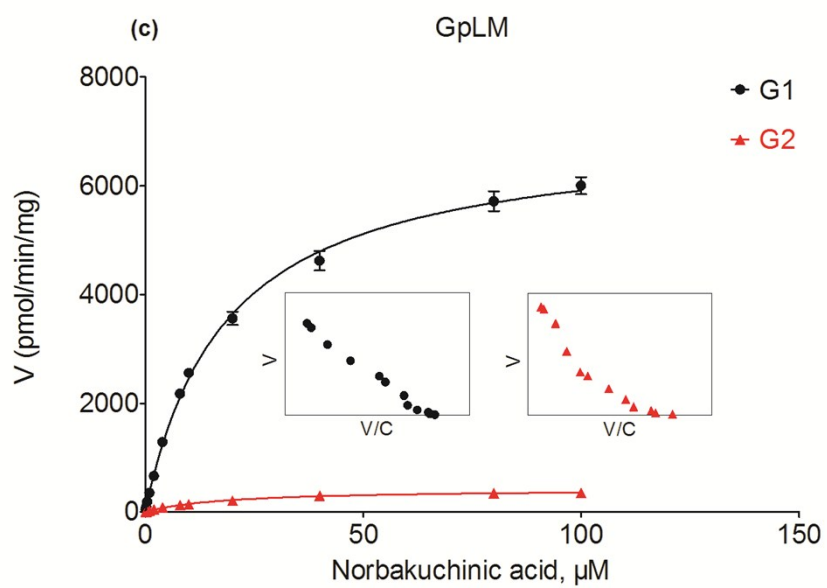

Figure S2-c

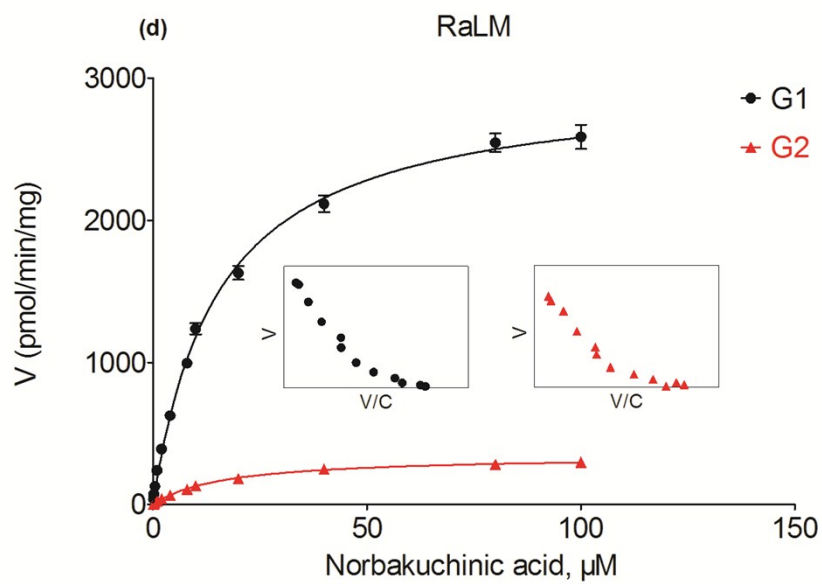

Figure S2-d

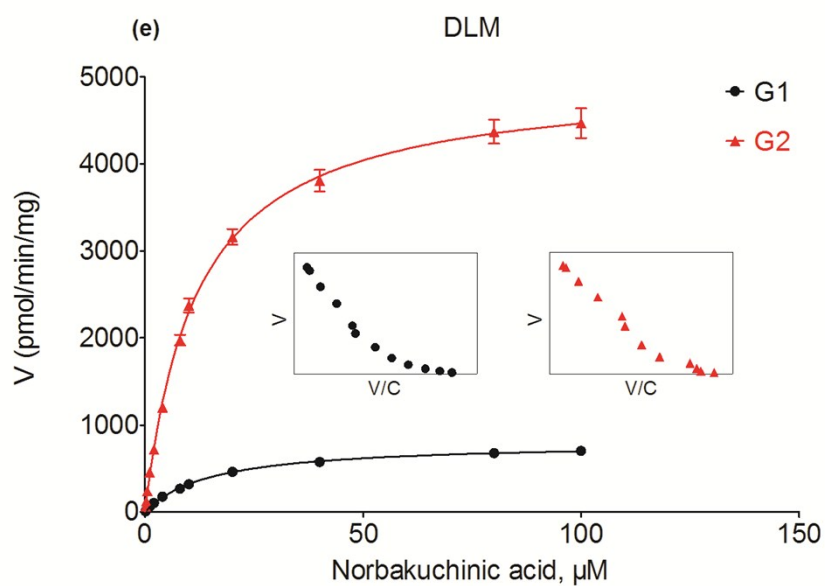

**Figure S2-e**

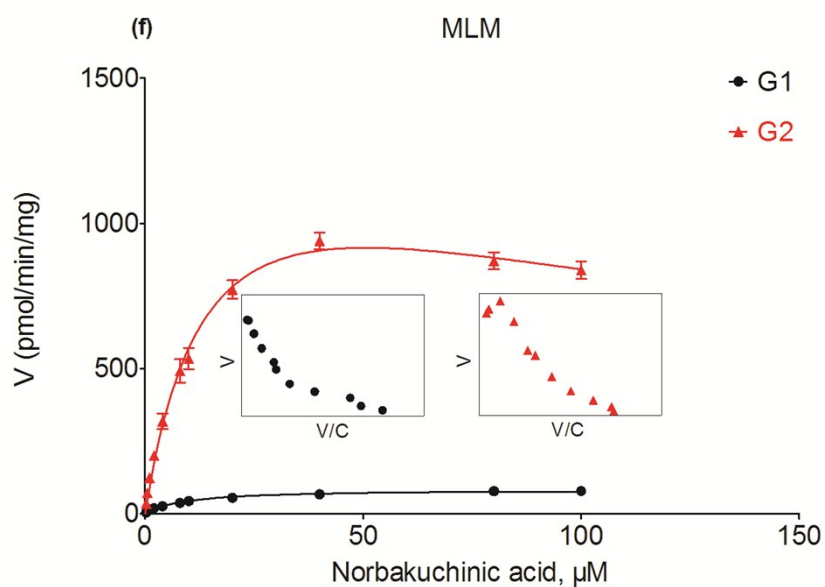

**Figure S2-f**

**Figure S2** Kinetic profiles for glucuronidation of norbakuchinic acid by various types of microsomes. (a) monkey liver microsomes (MkLM); (b) rat liver microsomes (RLM); (c) guinea pig liver microsomes (GpLM); (d) rabbit liver microsomes (RaLM); (e) dog liver microsomes (DLM); (f) mice liver microsomes (MLM); In each panel, the insert figure showed the corresponding Eadie-Hofstee plot. All experiments were performed in triplicate.

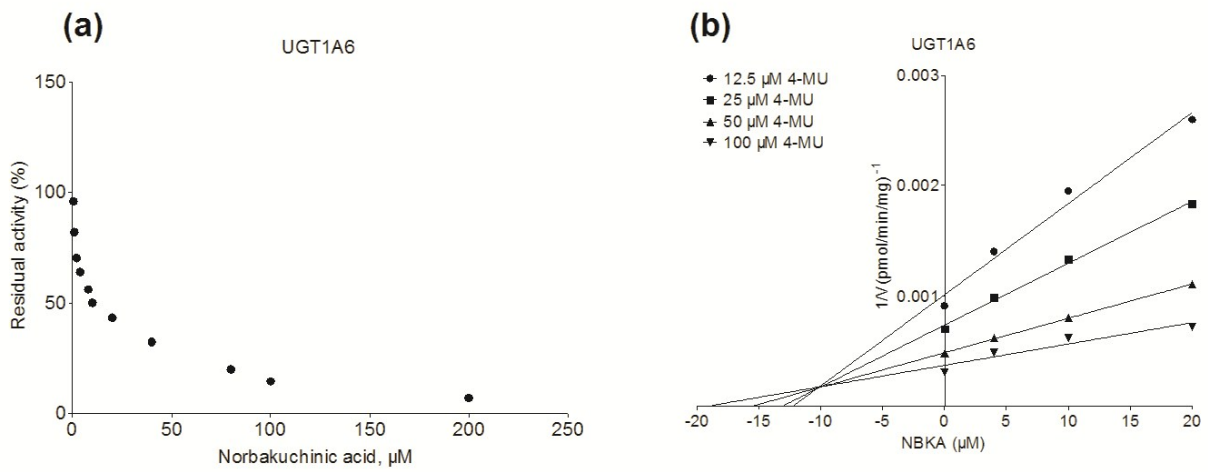

**Figure S3** Inhibition evaluation of NBKA toward Expressed UGT1A6-catalyzed 4-MU glucuronidation. Concentration-dependent plot (a) and Dixon plot (b) of NBKA's inhibition toward recombinant UGT1A6-catalyzed 4-MU glucuronidation. All experiments were performed in triplicate.



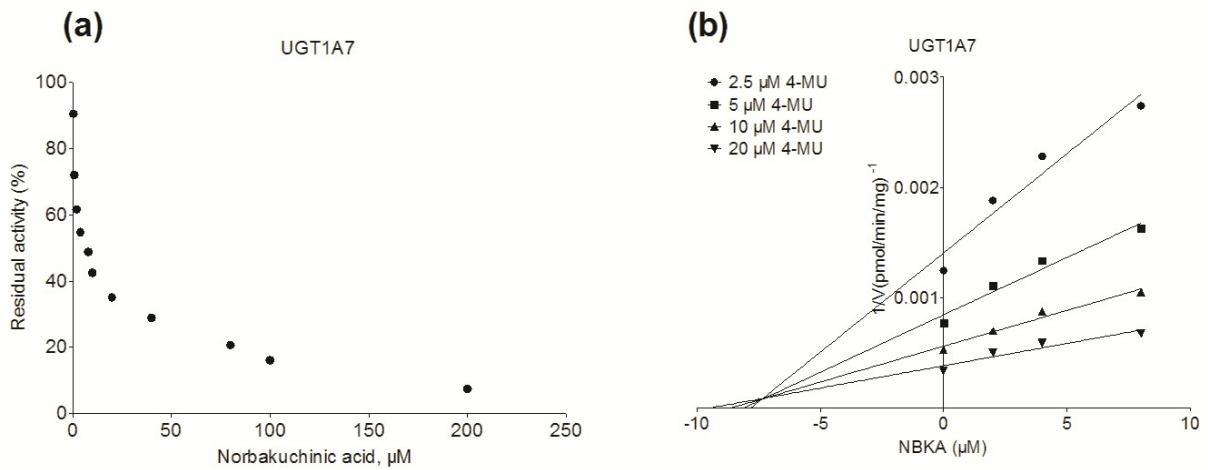

**Figure S4** Inhibition evaluation of NBKA toward Expressed UGT1A7-catalyzed 4-MU glucuronidation. Concentration-dependent plot (a) and Dixon plot (b) of NBKA's inhibition toward recombinant UGT1A7-catalyzed 4-MU glucuronidation. All experiments were performed in triplicate.

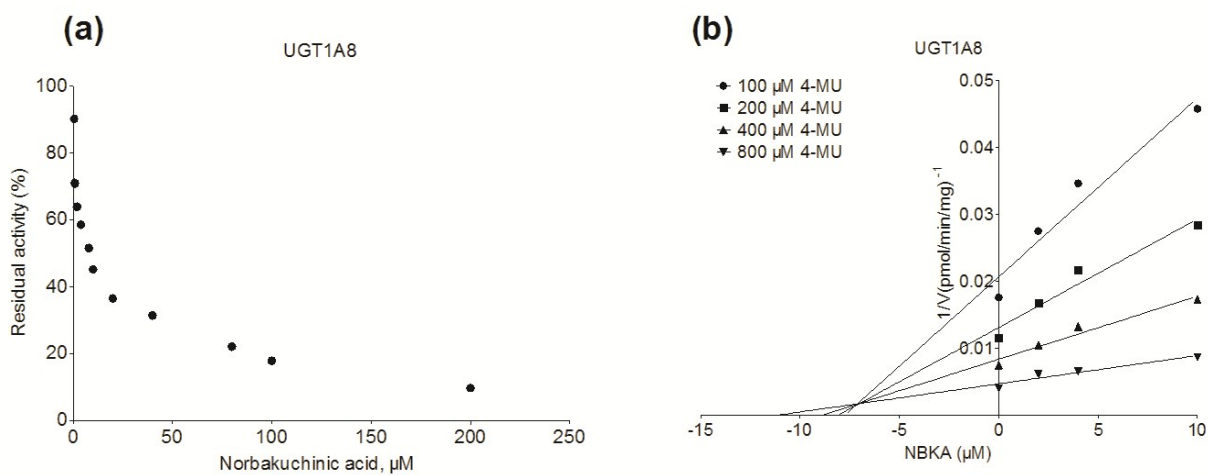

**Figure S5** Inhibition evaluation of NBKA toward Expressed UGT1A8-catalyzed 4-MU glucuronidation. Concentration-dependent plot (a) and Dixon plot (b) of NBKA's inhibition toward recombinant UGT1A8-catalyzed 4-MU glucuronidation. All experiments were performed in triplicate.

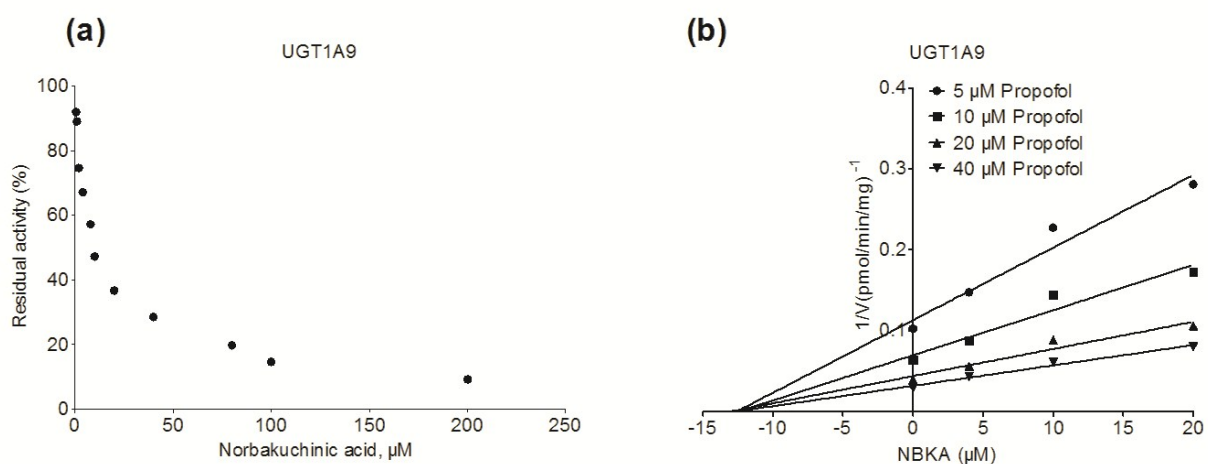

**Figure S6** Inhibition evaluation of NBKA toward Expressed UGT1A9-catalyzed propofol glucuronidation. Concentration-dependent plot (a) and Dixon plot (b) of NKBA's inhibition toward recombinant UGT1A9-catalyzed propofol glucuronidation. All experiments were performed in triplicate.

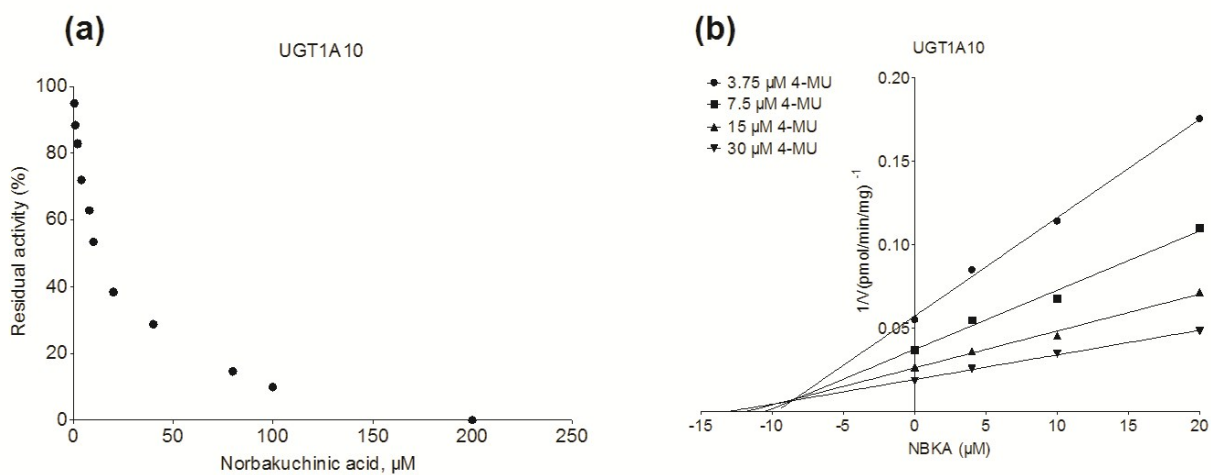

**Figure S7** Inhibition evaluation of NBKA toward Expressed UGT1A10-catalyzed 4-MU glucuronidation. Concentration-dependent plot (a) and Dixon plot (b) of NKBA's inhibition toward recombinant UGT1A10-catalyzed 4-MU glucuronidation. All experiments were performed in triplicate.

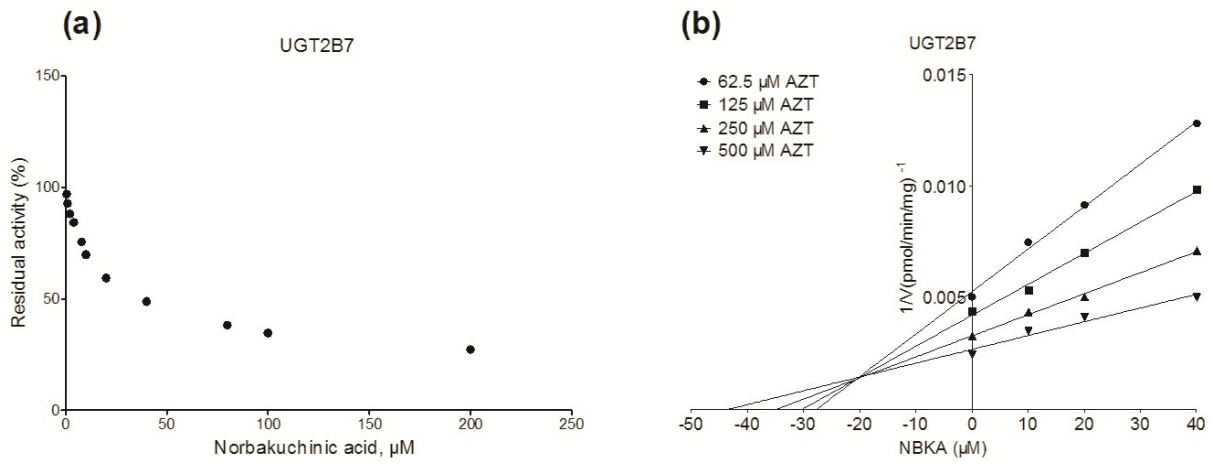

**Figure S8** Inhibition evaluation of NBKA toward Expressed UGT2B7-catalyzed AZT glucuronidation. Concentration-dependent plot (a) and Dixon plot (b) of NBKA's inhibition toward recombinant UGT2B7-catalyzed AZT glucuronidation. All experiments were performed in triplicate.

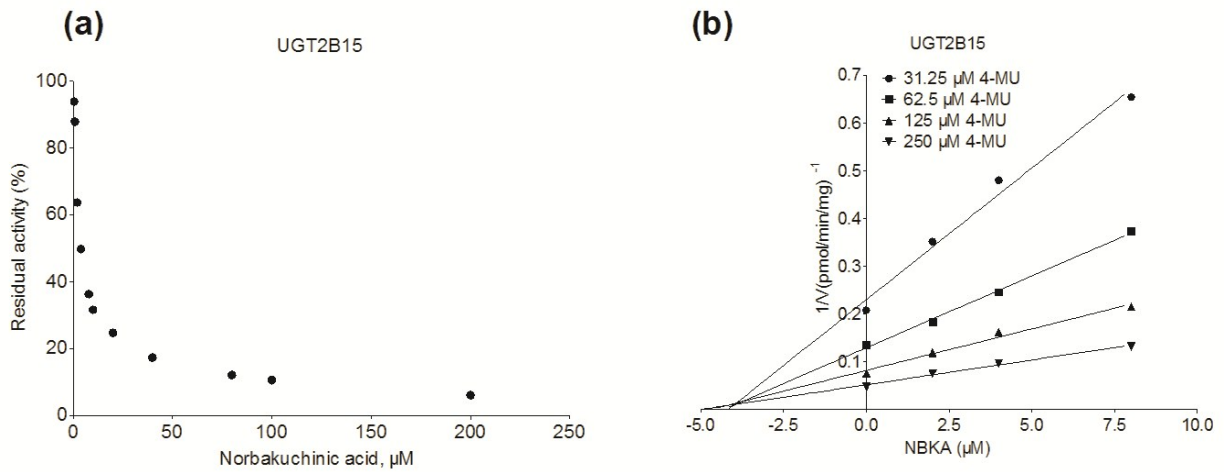

**Figure S9** Inhibition evaluation of NBKA toward Expressed UGT2B15-catalyzed 4-MU glucuronidation. Concentration-dependent plot (a) and Dixon plot (b) of NBKA's inhibition toward recombinant UGT2B15-catalyzed 4-MU glucuronidation. All experiments were performed in triplicate.

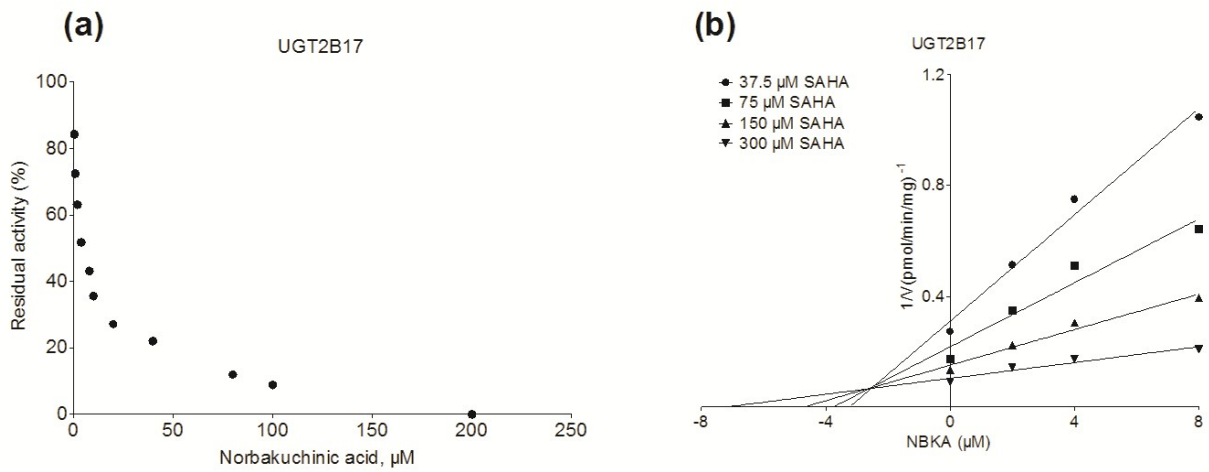

**Figure S10** Inhibition evaluation of NBKA toward Expressed UGT2B17-catalyzed SAHA glucuronidation. Concentration-dependent plot (a) and Dixon plot (b) of NBKA's inhibition toward recombinant UGT2B17-catalyzed SAHA glucuronidation. All experiments were performed in triplicate.
